# Supplementary material for: Interaction of Au(iii) with amino acids: a vade mecum for medicinal chemistry and nanotechnology
Source: Royal Society of Chemistry journal article supplement (doi:10.1039/d4tb00204k), 2024-01-01
Supplement: d4tb00204k1.pdf [file d4tb00204k1.pdf]

## SUPPORTING INFORMATION

### Interaction of Au(III) with amino acids. A vademecum for medicinal chemistry and nanotechnology

Edoardo Jun Mattioli, Beatrice Cipriani, Francesco Zerbetto, Tainah Dorina Marforio\* and Matteo Calvaresi\*

#### INDEX

**Table S1.** Cartesian coordinates for the complexes of Au(III) and peptide/protein backbone (Figure 1 in main text).

**Table S2.** Cartesian coordinates for the complexes of Au(III) and sulfur/selenium containing amino acids (Figure 5 in main text).

**Table S3.** Cartesian coordinates for the complexes of Au(III) and histidine (Figure 6 in main text).

**Table S4.** Cartesian coordinates for the complexes of Au(III) and aromatic amino acids (Figure 7 in main text).

**Table S5.** Cartesian coordinates for the complexes of Au(III) and charged amino acids (Figure 8 in main text).

**Table S6.** Cartesian coordinates for the complexes of Au(III) and polar amino acids (Figure 9 in main text).

**Table S1.** Cartesian coordinates for the complexes of Au(III) and peptide/protein backbone (Figure 1 in main text).

*N-terminal*•AuCl<sub>3</sub>

MP2=-1816.4457213

|    |           |           |           |
|----|-----------|-----------|-----------|
| N  | 1.006000  | 0.367000  | 0.542000  |
| H  | 1.310000  | -0.305000 | 1.254000  |
| C  | 1.970000  | 0.293000  | -0.562000 |
| H  | 1.712000  | -0.549000 | -1.206000 |
| C  | 3.347000  | 0.028000  | 0.037000  |
| O  | 3.437000  | -0.481000 | 1.148000  |
| N  | 4.388000  | 0.344000  | -0.728000 |
| H  | 4.226000  | 0.771000  | -1.625000 |
| H  | 1.927000  | 1.208000  | -1.148000 |
| C  | 5.748000  | 0.069000  | -0.321000 |
| H  | 6.421000  | 0.425000  | -1.098000 |
| H  | 5.983000  | 0.580000  | 0.614000  |
| H  | 5.902000  | -1.002000 | -0.179000 |
| Au | -0.962000 | 0.004000  | 0.063000  |
| Cl | -1.320000 | 2.283000  | 0.121000  |
| Cl | -3.160000 | -0.397000 | -0.457000 |
| Cl | -0.471000 | -2.250000 | 0.022000  |
| H  | 1.026000  | 1.291000  | 0.971000  |

*N-terminal*

*N-backbone*•AuCl<sub>3</sub>

MP2=-1968.2078233

|    |           |           |           |
|----|-----------|-----------|-----------|
| C  | -1.247000 | 1.711000  | 0.878000  |
| O  | -2.380000 | 2.212000  | 0.835000  |
| N  | -0.812000 | 0.898000  | -0.093000 |
| C  | -1.625000 | 0.660000  | -1.267000 |
| H  | -2.153000 | 1.587000  | -1.515000 |
| C  | -2.648000 | -0.460000 | -1.108000 |
| O  | -2.629000 | -1.462000 | -1.815000 |
| H  | -0.980000 | 0.397000  | -2.104000 |
| C  | -0.313000 | 1.994000  | 2.020000  |
| H  | -0.144000 | 1.083000  | 2.599000  |
| H  | 0.656000  | 2.344000  | 1.660000  |
| H  | -0.757000 | 2.749000  | 2.665000  |
| N  | -3.565000 | -0.240000 | -0.159000 |
| H  | -3.491000 | 0.631000  | 0.355000  |
| C  | -4.594000 | -1.197000 | 0.158000  |
| H  | -5.187000 | -0.814000 | 0.985000  |
| H  | -5.253000 | -1.370000 | -0.697000 |
| H  | -4.161000 | -2.158000 | 0.450000  |
| Au | 0.935000  | -0.095000 | -0.000000 |
| Cl | 2.962000  | -1.262000 | 0.059000  |
| Cl | -0.058000 | -1.673000 | 1.374000  |

Cl 1.855000 1.534000 -1.366000

*C-backbone*•AuCl<sub>3</sub>

MP2=-1969.4980381

H 2.110000 3.730000 0.094000  
C 1.342000 3.215000 0.665000  
H 0.956000 3.879000 1.442000  
H 1.771000 2.339000 1.157000  
C 0.238000 2.787000 -0.259000  
O 0.233000 3.007000 -1.457000  
N -0.762000 2.089000 0.349000  
H -0.754000 2.011000 1.354000  
C -1.908000 1.630000 -0.373000  
H -2.755000 2.318000 -0.293000  
H -1.631000 1.570000 -1.431000  
C -2.343000 0.255000 0.056000  
O -1.550000 -0.683000 0.348000  
N -3.628000 0.015000 0.115000  
H -4.261000 0.781000 -0.050000  
C -4.175000 -1.289000 0.435000  
H -3.714000 -2.048000 -0.196000  
H -3.983000 -1.535000 1.481000  
H -5.246000 -1.265000 0.258000  
Au 0.487000 -0.647000 0.031000  
Cl 0.789000 -0.325000 2.301000  
Cl 2.728000 -0.734000 -0.297000  
Cl 0.092000 -0.916000 -2.225000

*C-terminal*•AuCl<sub>3</sub>

MP2=-2004.9812642

H -6.788000 -0.881000 1.093000  
C -6.148000 -0.001000 1.168000  
H -5.652000 -0.001000 2.138000  
H -6.788000 0.880000 1.094000  
C -5.191000 0.000000 0.007000  
O -5.582000 0.001000 -1.156000  
N -3.885000 -0.000000 0.319000  
H -3.573000 -0.000000 1.278000  
C -2.855000 0.001000 -0.677000  
H -2.923000 -0.877000 -1.328000  
C -1.495000 0.000000 -0.005000  
O -1.373000 -0.000000 1.206000  
H -2.923000 0.879000 -1.327000  
Au 1.342000 0.000000 -0.108000  
Cl 1.301000 -2.308000 -0.118000  
Cl 3.506000 -0.000000 0.648000  
Cl 1.302000 2.308000 -0.117000  
O -0.537000 0.000000 -0.875000

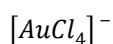

MP2=-1973,679602

|    |          |           |           |
|----|----------|-----------|-----------|
| Au | 0.000000 | 0.000000  | 0.000066  |
| Cl | 0.000000 | 2.314079  | -0.000005 |
| Cl | 0.000000 | 0.000000  | -2.314350 |
| Cl | 0.000000 | -2.314079 | -0.000005 |
| Cl | 0.000000 | 0.000000  | 2.314054  |

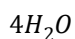

MP2=-305.3095165

|   |           |           |           |
|---|-----------|-----------|-----------|
| O | 0.006347  | 1.842653  | 0.183424  |
| H | 0.082369  | 2.516619  | -0.497388 |
| H | 0.778290  | 1.257917  | 0.063118  |
| O | -2.076969 | 0.068580  | -0.000208 |
| H | -2.490366 | 0.146753  | -0.864004 |
| H | -1.403158 | 0.781588  | 0.030569  |
| O | -0.177107 | -2.031285 | 0.085800  |
| H | 0.622946  | -1.491598 | 0.026099  |
| H | -0.900372 | -1.379807 | 0.049972  |
| O | 2.013339  | -0.084186 | -0.083793 |
| H | 2.673081  | -0.106318 | 0.616849  |
| H | 2.512324  | -0.091249 | -0.906999 |

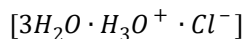

MP2=-765,6281806

|    |           |           |           |
|----|-----------|-----------|-----------|
| O  | 1.642179  | 1.454089  | 0.749396  |
| H  | 1.617104  | 1.504935  | 1.709540  |
| H  | 0.708090  | 1.528343  | 0.457202  |
| O  | 2.264150  | -0.876937 | -0.316704 |
| H  | 2.645526  | -1.503887 | 0.305895  |
| H  | 2.158875  | -0.009332 | 0.163804  |
| O  | -0.073654 | -1.297489 | -0.993501 |
| H  | -0.596874 | -1.634971 | -0.193838 |
| H  | 0.948418  | -1.197573 | -0.708646 |
| O  | -1.526464 | -1.535536 | 1.099210  |
| H  | -1.772080 | -0.600330 | 0.989299  |
| H  | -2.350954 | -2.032128 | 1.087801  |
| Cl | -1.257036 | 1.314384  | -0.415768 |
| H  | -0.438184 | -0.352596 | -1.050217 |

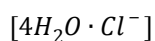

MP2=-765,190263

|   |           |          |           |
|---|-----------|----------|-----------|
| O | -0.011295 | 2.256746 | -0.298063 |
| H | -0.276785 | 2.994786 | 0.257402  |
| H | -0.734371 | 1.592265 | -0.209154 |
| O | 2.380951  | 1.157699 | 0.359960  |

|    |           |           |           |
|----|-----------|-----------|-----------|
| H  | 2.439448  | 1.160567  | 1.318818  |
| H  | 1.514411  | 1.577088  | 0.152389  |
| O  | 2.178852  | -1.507611 | -0.537633 |
| H  | 1.303550  | -1.791876 | -0.222617 |
| H  | 2.267952  | -0.588667 | -0.227718 |
| O  | -0.385046 | -2.292951 | 0.390319  |
| H  | -0.983600 | -1.523612 | 0.261787  |
| H  | -0.760856 | -2.990896 | -0.152962 |
| Cl | -2.239849 | 0.156428  | -0.029095 |

**Table S2.** Cartesian coordinates for the complexes of Au(III) and sulfur/selenium containing amino acids (Figure 5 in main text).

*Sec*•AuCl<sub>3</sub>

MP2=-4408,434291

|    |           |           |           |
|----|-----------|-----------|-----------|
| H  | 4.394854  | -3.865532 | -0.100985 |
| C  | 4.460332  | -3.017546 | -0.785187 |
| H  | 4.537139  | -3.415362 | -1.798105 |
| H  | 5.356500  | -2.442066 | -0.554800 |
| C  | 3.190213  | -2.219218 | -0.677447 |
| O  | 2.098265  | -2.703426 | -0.952732 |
| N  | 3.329814  | -0.947361 | -0.259572 |
| H  | 4.239499  | -0.563889 | -0.051944 |
| C  | 2.216793  | -0.048818 | -0.097310 |
| H  | 1.463227  | -0.304552 | -0.845421 |
| C  | 1.614943  | -0.222989 | 1.302290  |
| H  | 1.361746  | -1.272000 | 1.449406  |
| H  | 2.341916  | 0.076548  | 2.062751  |
| Se | 0.034559  | 0.845939  | 1.690667  |
| C  | 2.742734  | 1.366005  | -0.321929 |
| O  | 3.892159  | 1.657342  | -0.003031 |
| N  | 1.887161  | 2.229183  | -0.868812 |
| H  | 0.920702  | 1.953898  | -0.983930 |
| C  | 2.212762  | 3.626465  | -1.022270 |
| H  | 3.158831  | 3.737064  | -1.553077 |
| H  | 1.424084  | 4.106872  | -1.598302 |
| H  | 2.301221  | 4.126725  | -0.053719 |
| Au | -1.470061 | -0.102364 | -0.005689 |
| Cl | -2.984516 | -1.023615 | -1.658452 |
| Cl | -1.529565 | 1.971318  | -1.062004 |
| Cl | -1.348106 | -2.138793 | 1.081076  |

*Sec*

MP2=-2895,019169

|   |         |          |          |
|---|---------|----------|----------|
| C | 4.46274 | -3.02161 | -0.71441 |
| C | 3.18951 | -2.22445 | -0.65146 |
| N | 3.32082 | -0.92729 | -0.31614 |
| C | 2.19295 | -0.03977 | -0.20165 |

|    |         |          |          |
|----|---------|----------|----------|
| C  | 2.7223  | 1.38239  | -0.35113 |
| N  | 1.89101 | 2.25546  | -0.92366 |
| C  | 2.20467 | 3.66083  | -1.03048 |
| O  | 2.09763 | -2.72773 | -0.89192 |
| C  | 1.5109  | -0.23699 | 1.15656  |
| Se | -0.2018 | 0.67502  | 1.38033  |
| O  | 3.83959 | 1.6781   | 0.05878  |
| H  | 4.40964 | -3.81918 | 0.02896  |
| H  | 4.53166 | -3.48986 | -1.69731 |
| H  | 5.35737 | -2.42591 | -0.53551 |
| H  | 4.22204 | -0.53185 | -0.09434 |
| H  | 1.47992 | -0.2755  | -0.99456 |
| H  | 1.26978 | -1.29448 | 1.26464  |
| H  | 2.17728 | 0.05366  | 1.96816  |
| H  | 0.96979 | 1.94162  | -1.18126 |
| H  | 3.21767 | 3.7865   | -1.4129  |
| H  | 1.50293 | 4.1268   | -1.71914 |
| H  | 2.13715 | 4.16058  | -0.06033 |
| H  | 0.36199 | 2.01565  | 1.57991  |

*Cys*•AuCl<sub>3</sub>

MP2= -2406,025408

|    |       |       |        |
|----|-------|-------|--------|
| H  | 2.771 | 1.103 | -0.420 |
| C  | 2.635 | 2.022 | 0.162  |
| H  | 2.362 | 1.724 | 1.180  |
| H  | 1.812 | 2.599 | -0.272 |
| C  | 3.940 | 2.771 | 0.206  |
| O  | 4.969 | 2.265 | 0.651  |
| N  | 3.908 | 4.040 | -0.271 |
| H  | 3.060 | 4.460 | -0.638 |
| C  | 5.081 | 4.878 | -0.261 |
| H  | 5.639 | 4.680 | 0.665  |
| C  | 5.971 | 4.546 | -1.471 |
| H  | 6.029 | 3.457 | -1.587 |
| H  | 5.520 | 4.957 | -2.388 |
| S  | 7.655 | 5.227 | -1.403 |
| C  | 4.610 | 6.327 | -0.317 |
| O  | 3.561 | 6.612 | -0.892 |
| N  | 5.428 | 7.219 | 0.269  |
| H  | 6.290 | 6.880 | 0.692  |
| C  | 5.187 | 8.646 | 0.236  |
| H  | 4.226 | 8.817 | -0.253 |
| H  | 5.150 | 9.056 | 1.251  |
| H  | 5.972 | 9.165 | -0.326 |
| Au | 8.471 | 3.886 | 0.411  |
| Cl | 9.308 | 2.513 | 2.273  |
| Cl | 8.649 | 2.056 | -1.098 |
| Cl | 8.223 | 5.766 | 1.865  |

Cys(H)•AuCl<sub>3</sub>

MP2= -2406,437529

|    |       |       |        |
|----|-------|-------|--------|
| H  | 1.677 | 1.771 | 0.266  |
| C  | 1.868 | 2.837 | 0.428  |
| H  | 1.446 | 3.099 | 1.406  |
| H  | 1.353 | 3.418 | -0.343 |
| C  | 3.353 | 3.065 | 0.469  |
| O  | 4.106 | 2.408 | 1.176  |
| N  | 3.815 | 4.081 | -0.323 |
| H  | 3.194 | 4.542 | -0.979 |
| C  | 5.225 | 4.388 | -0.387 |
| H  | 5.656 | 4.104 | 0.583  |
| C  | 5.872 | 3.533 | -1.477 |
| H  | 5.890 | 2.482 | -1.172 |
| H  | 5.324 | 3.631 | -2.422 |
| S  | 7.597 | 3.970 | -1.924 |
| H  | 7.281 | 5.181 | -2.451 |
| C  | 5.394 | 5.878 | -0.671 |
| O  | 5.315 | 6.296 | -1.825 |
| N  | 5.635 | 6.639 | 0.411  |
| H  | 5.666 | 6.193 | 1.321  |
| C  | 5.817 | 8.075 | 0.349  |
| H  | 5.856 | 8.367 | -0.703 |
| H  | 4.989 | 8.597 | 0.840  |
| H  | 6.759 | 8.353 | 0.834  |
| Au | 8.537 | 4.881 | 0.121  |
| Cl | 9.381 | 5.792 | 2.144  |
| Cl | 9.015 | 6.896 | -1.035 |
| Cl | 8.059 | 2.809 | 1.183  |

Cys

MP2=-892.620411

|   |           |           |          |
|---|-----------|-----------|----------|
| H | 0.000000  | 0.000000  | 0.000000 |
| C | 0.000000  | 0.000000  | 1.090847 |
| H | 1.028173  | 0.000000  | 1.451725 |
| H | -0.494593 | -0.915226 | 1.421631 |
| C | -0.802977 | 1.177142  | 1.570691 |
| O | -1.955057 | 1.370972  | 1.198090 |
| N | -0.182310 | 2.002457  | 2.433757 |
| H | 0.761171  | 1.824469  | 2.743727 |
| C | -0.820008 | 3.166630  | 2.987363 |
| H | -1.428378 | 3.639737  | 2.212979 |
| C | -1.737590 | 2.760262  | 4.150658 |
| H | -2.417112 | 1.992410  | 3.778224 |
| H | -1.149992 | 2.328558  | 4.961927 |
| S | -2.812811 | 4.066053  | 4.787841 |
| H | -1.885121 | 4.746764  | 5.478799 |

|   |           |          |          |
|---|-----------|----------|----------|
| C | 0.284746  | 4.105903 | 3.458193 |
| O | 1.359571  | 3.662474 | 3.848335 |
| N | -0.010290 | 5.407298 | 3.438422 |
| H | -0.930754 | 5.687661 | 3.142769 |
| C | 0.898250  | 6.407850 | 3.947298 |
| H | 1.892812  | 6.257986 | 3.526178 |
| H | 0.533955  | 7.391758 | 3.659846 |
| H | 0.974381  | 6.360299 | 5.036705 |

Met•AuI<sub>3</sub>

MP2= -2484,879375

|    |        |       |        |
|----|--------|-------|--------|
| H  | 1.693  | 2.152 | 1.793  |
| C  | 2.035  | 2.234 | 0.755  |
| H  | 1.311  | 2.826 | 0.187  |
| H  | 2.064  | 1.219 | 0.343  |
| C  | 3.427  | 2.807 | 0.745  |
| O  | 4.347  | 2.308 | 1.387  |
| N  | 3.600  | 3.914 | -0.020 |
| H  | 2.850  | 4.302 | -0.582 |
| C  | 4.881  | 4.569 | -0.138 |
| H  | 5.374  | 4.546 | 0.846  |
| C  | 5.764  | 3.840 | -1.166 |
| H  | 5.764  | 2.774 | -0.906 |
| H  | 5.290  | 3.946 | -2.154 |
| C  | 7.184  | 4.373 | -1.182 |
| H  | 7.240  | 5.445 | -1.407 |
| H  | 7.700  | 4.180 | -0.229 |
| S  | 8.189  | 3.487 | -2.419 |
| C  | 9.756  | 4.385 | -2.256 |
| H  | 10.164 | 4.162 | -1.265 |
| H  | 10.430 | 4.009 | -3.032 |
| H  | 9.590  | 5.460 | -2.378 |
| C  | 4.614  | 5.996 | -0.605 |
| O  | 3.709  | 6.219 | -1.405 |
| N  | 5.458  | 6.934 | -0.130 |
| H  | 6.117  | 6.675 | 0.594  |
| C  | 5.401  | 8.322 | -0.538 |
| H  | 4.695  | 8.400 | -1.369 |
| H  | 5.059  | 8.963 | 0.282  |
| H  | 6.387  | 8.663 | -0.871 |
| Au | 7.517  | 4.290 | -4.618 |
| Cl | 8.415  | 2.235 | -5.410 |
| Cl | 6.722  | 6.361 | -3.781 |
| Cl | 6.951  | 4.963 | -6.834 |

Met

MP2=-971.052792

|   |          |          |          |
|---|----------|----------|----------|
| H | 0.000000 | 0.000000 | 0.000000 |
|---|----------|----------|----------|



|   |           |           |          |
|---|-----------|-----------|----------|
| C | 0.000000  | 0.000000  | 1.091146 |
| H | 1.028850  | 0.000000  | 1.450247 |
| H | -0.494614 | -0.915030 | 1.421613 |
| C | -0.803315 | 1.177688  | 1.570959 |
| O | -1.972184 | 1.340798  | 1.236930 |
| N | -0.160128 | 2.037414  | 2.381183 |
| H | 0.791905  | 1.865206  | 2.664817 |
| C | -0.794841 | 3.200267  | 2.947429 |
| H | -1.513122 | 3.581641  | 2.217526 |
| C | -1.533993 | 2.842484  | 4.243929 |
| H | -2.218024 | 2.024004  | 4.004402 |
| H | -0.803376 | 2.460891  | 4.963334 |
| C | -2.305763 | 4.004238  | 4.840679 |
| H | -1.633170 | 4.812506  | 5.139155 |
| H | -3.018725 | 4.406596  | 4.114332 |
| S | -3.215419 | 3.449620  | 6.299545 |
| C | -3.964355 | 5.008084  | 6.791742 |
| H | -4.619559 | 5.390022  | 6.007194 |
| H | -4.557349 | 4.814089  | 7.685840 |
| H | -3.199257 | 5.749717  | 7.026970 |
| C | 0.298692  | 4.224584  | 3.220124 |
| O | 1.382418  | 3.873287  | 3.673788 |
| N | -0.011887 | 5.500001  | 2.974451 |
| H | -0.904104 | 5.715459  | 2.563887 |
| C | 0.903615  | 6.578694  | 3.263856 |
| H | 1.205491  | 6.553396  | 4.312519 |
| H | 1.801543  | 6.507255  | 2.646134 |
| H | 0.406204  | 7.524214  | 3.059438 |

**Table S3.** Cartesian coordinates for the complexes of Au(III) and histidine (Figure 6 in main text).

*His(N $\delta$ )•AuCl<sub>3</sub>*

MP2=-2233,356548

|   |       |       |        |
|---|-------|-------|--------|
| H | 2.082 | 1.209 | -0.182 |
| C | 2.092 | 2.160 | 0.363  |
| H | 1.761 | 1.950 | 1.386  |
| H | 1.380 | 2.847 | -0.106 |
| C | 3.502 | 2.683 | 0.405  |
| O | 4.427 | 2.040 | 0.894  |
| N | 3.688 | 3.920 | -0.125 |
| H | 2.938 | 4.419 | -0.592 |
| C | 4.991 | 4.532 | -0.179 |
| H | 5.520 | 4.318 | 0.760  |
| C | 5.821 | 3.961 | -1.356 |
| H | 6.023 | 2.904 | -1.147 |
| H | 5.208 | 4.012 | -2.266 |
| C | 7.077 | 4.732 | -1.539 |
| N | 7.196 | 5.736 | -2.480 |

H 6.533 5.932 -3.224  
C 8.326 6.420 -2.263  
H 8.679 7.254 -2.855  
N 8.939 5.893 -1.213  
C 8.185 4.838 -0.749  
H 8.472 4.268 0.126  
C 4.806 6.029 -0.389  
O 3.938 6.441 -1.155  
N 5.695 6.825 0.234  
H 6.371 6.421 0.873  
C 5.764 8.249 -0.026  
H 5.548 8.434 -1.084  
H 5.044 8.812 0.581  
H 6.775 8.599 0.202  
Au 10.541 6.735 -0.251  
Cl 11.800 6.597 -2.256  
Cl 9.199 6.898 1.711  
Cl 12.361 7.713 0.870

*His(Nε)•AuCl<sub>3</sub>*

MP2=-2233,363102

H 2.627 2.655 2.752  
C 2.622 2.514 1.665  
H 1.716 2.969 1.254  
H 2.598 1.434 1.479  
C 3.893 3.081 1.094  
O 5.003 2.646 1.399  
N 3.747 4.111 0.226  
H 2.838 4.448 -0.076  
C 4.897 4.733 -0.377  
H 5.630 4.954 0.413  
C 5.569 3.803 -1.428  
H 5.212 2.785 -1.239  
H 5.243 4.063 -2.444  
C 7.051 3.781 -1.332  
N 7.931 4.548 -2.081  
C 9.170 4.286 -1.679  
H 10.073 4.729 -2.075  
N 9.121 3.382 -0.697  
H 9.929 3.004 -0.215  
C 7.808 3.055 -0.458  
H 7.501 2.357 0.309  
C 4.424 6.014 -1.050  
O 3.269 6.129 -1.448  
N 5.368 6.959 -1.240  
H 6.261 6.880 -0.764  
C 5.040 8.214 -1.889  
H 4.545 8.018 -2.846

H 4.372 8.824 -1.268  
H 5.967 8.763 -2.076  
Au 7.523 5.929 -3.555  
Cl 8.626 7.577 -2.239  
Cl 6.495 4.247 -4.878  
Cl 7.088 7.523 -5.227

*His - N $\delta$  tautomer*

MP2=-719.520934

|   |           |           |          |
|---|-----------|-----------|----------|
| H | 0.000000  | 0.000000  | 0.000000 |
| C | 0.000000  | 0.000000  | 1.091372 |
| H | 1.039944  | 0.000000  | 1.421686 |
| H | -0.490684 | -0.904687 | 1.449031 |
| C | -0.655271 | 1.265968  | 1.569922 |
| O | -0.214894 | 2.372696  | 1.276646 |
| N | -1.748722 | 1.111072  | 2.337647 |
| H | -2.099433 | 0.194396  | 2.571574 |
| C | -2.484992 | 2.222756  | 2.869925 |
| H | -1.778716 | 3.001737  | 3.166953 |
| C | -3.438998 | 2.816415  | 1.807695 |
| H | -2.820392 | 3.078853  | 0.947592 |
| H | -4.131082 | 2.034110  | 1.485447 |
| C | -4.184337 | 4.011161  | 2.278787 |
| N | -5.493748 | 3.972955  | 2.679270 |
| H | -6.095912 | 3.165911  | 2.655197 |
| C | -5.837654 | 5.206259  | 3.109452 |
| H | -6.828455 | 5.436917  | 3.470976 |
| N | -4.831878 | 6.043230  | 3.016606 |
| C | -3.796452 | 5.307048  | 2.500179 |
| H | -2.826113 | 5.741484  | 2.309640 |
| C | -3.266107 | 1.727055  | 4.080279 |
| O | -3.615506 | 0.554770  | 4.169111 |
| N | -3.559881 | 2.656375  | 4.993965 |
| H | -3.290158 | 3.609020  | 4.808638 |
| C | -4.420418 | 2.385400  | 6.120733 |
| H | -4.119750 | 1.455242  | 6.602789 |
| H | -4.332363 | 3.201415  | 6.835121 |
| H | -5.465741 | 2.293781  | 5.812400 |

*His - N $\epsilon$  tautomer*

MP2=-719.523555

|   |           |           |          |
|---|-----------|-----------|----------|
| H | 0.000000  | 0.000000  | 0.000000 |
| C | 0.000000  | 0.000000  | 1.091526 |
| H | 1.040026  | 0.000000  | 1.421587 |
| H | -0.490881 | -0.905267 | 1.447892 |
| C | -0.657227 | 1.265094  | 1.572193 |
| O | -0.209276 | 2.372557  | 1.288649 |
| N | -1.764961 | 1.108242  | 2.314635 |

|   |           |          |          |
|---|-----------|----------|----------|
| H | -2.057112 | 0.196002 | 2.636689 |
| C | -2.463975 | 2.214670 | 2.908878 |
| H | -1.733153 | 2.893680 | 3.362251 |
| C | -3.276378 | 3.013747 | 1.863512 |
| H | -2.783527 | 2.883841 | 0.900141 |
| H | -4.277284 | 2.578355 | 1.774378 |
| C | -3.361271 | 4.474945 | 2.142061 |
| N | -3.810444 | 4.978957 | 3.339412 |
| C | -3.742440 | 6.286244 | 3.237623 |
| H | -4.016243 | 6.999137 | 3.999957 |
| N | -3.272772 | 6.650492 | 2.030974 |
| H | -3.129511 | 7.594435 | 1.711994 |
| C | -3.018677 | 5.510897 | 1.318525 |
| H | -2.626095 | 5.532487 | 0.315662 |
| C | -3.335630 | 1.630566 | 4.029244 |
| O | -3.345721 | 0.420455 | 4.252983 |
| N | -4.059491 | 2.510384 | 4.713835 |
| H | -4.038404 | 3.494681 | 4.423853 |
| C | -4.949502 | 2.094168 | 5.768924 |
| H | -4.403256 | 1.586957 | 6.567587 |
| H | -5.436414 | 2.976082 | 6.181800 |
| H | -5.715724 | 1.409507 | 5.396090 |

**Table S4.** Cartesian coordinates for the complexes of Au(III) and aromatic amino acids (Figure 7 in main text).

*Trp*•AuCl<sub>3</sub>

MP2=-2370,619766

|   |        |       |        |
|---|--------|-------|--------|
| H | 2.031  | 2.694 | 2.429  |
| C | 2.366  | 2.558 | 1.395  |
| H | 1.544  | 2.803 | 0.715  |
| H | 2.622  | 1.499 | 1.273  |
| C | 3.599  | 3.387 | 1.169  |
| O | 4.572  | 3.339 | 1.919  |
| N | 3.578  | 4.198 | 0.079  |
| H | 2.816  | 4.180 | -0.592 |
| C | 4.713  | 5.009 | -0.260 |
| H | 5.087  | 5.495 | 0.652  |
| C | 5.843  | 4.132 | -0.875 |
| H | 5.924  | 3.234 | -0.250 |
| H | 5.534  | 3.827 | -1.883 |
| C | 7.147  | 4.833 | -0.883 |
| C | 7.776  | 5.510 | -2.013 |
| H | 7.180  | 6.072 | -2.737 |
| N | 8.908  | 6.155 | -1.503 |
| H | 9.563  | 6.682 | -2.068 |
| C | 9.078  | 5.833 | -0.200 |
| C | 10.094 | 6.185 | 0.695  |

|    |        |       |        |
|----|--------|-------|--------|
| H  | 10.938 | 6.795 | 0.386  |
| C  | 9.965  | 5.723 | 1.988  |
| H  | 10.737 | 5.980 | 2.711  |
| C  | 8.868  | 4.927 | 2.427  |
| H  | 8.834  | 4.610 | 3.466  |
| C  | 7.874  | 4.567 | 1.560  |
| H  | 7.014  | 3.973 | 1.872  |
| C  | 7.973  | 5.019 | 0.216  |
| C  | 4.280  | 6.022 | -1.310 |
| O  | 3.430  | 5.729 | -2.144 |
| N  | 4.956  | 7.188 | -1.311 |
| H  | 5.535  | 7.430 | -0.516 |
| C  | 4.710  | 8.192 | -2.329 |
| H  | 4.801  | 7.743 | -3.324 |
| H  | 3.704  | 8.620 | -2.233 |
| H  | 5.450  | 8.988 | -2.227 |
| Au | 8.299  | 3.792 | -3.277 |
| Cl | 8.858  | 1.982 | -4.813 |
| Cl | 6.332  | 4.325 | -4.521 |
| Cl | 10.186 | 3.260 | -1.933 |

*Trp*

MP2=-856.787575

|   |           |           |          |
|---|-----------|-----------|----------|
| H | 0.000000  | 0.000000  | 0.000000 |
| C | 0.000000  | 0.000000  | 1.091431 |
| H | 1.040023  | 0.000000  | 1.421524 |
| H | -0.490704 | -0.905028 | 1.448523 |
| C | -0.656264 | 1.265575  | 1.570641 |
| O | -0.211725 | 2.372847  | 1.279924 |
| N | -1.753996 | 1.112250  | 2.329339 |
| H | -2.087547 | 0.197766  | 2.595422 |
| C | -2.475623 | 2.229399  | 2.871445 |
| H | -1.754726 | 2.984262  | 3.196456 |
| C | -3.407004 | 2.870735  | 1.815241 |
| H | -2.822644 | 2.919941  | 0.892164 |
| H | -4.251528 | 2.201444  | 1.630997 |
| C | -3.877783 | 4.231919  | 2.184952 |
| C | -5.147303 | 4.623117  | 2.512749 |
| H | -6.053446 | 4.037759  | 2.556390 |
| N | -5.164869 | 5.958163  | 2.814469 |
| H | -5.982140 | 6.478994  | 3.079682 |
| C | -3.901565 | 6.467172  | 2.692368 |
| C | -3.420476 | 7.758813  | 2.889596 |
| H | -4.078784 | 8.564426  | 3.194561 |
| C | -2.070777 | 7.973608  | 2.680411 |
| H | -1.663141 | 8.967663  | 2.825907 |
| C | -1.216925 | 6.931836  | 2.282502 |
| H | -0.164652 | 7.141950  | 2.126762 |

|   |           |          |          |
|---|-----------|----------|----------|
| C | -1.695477 | 5.650523 | 2.087138 |
| H | -1.034708 | 4.846121 | 1.778110 |
| C | -3.057581 | 5.403612 | 2.294705 |
| C | -3.271197 | 1.727535 | 4.069109 |
| O | -3.517169 | 0.534108 | 4.216494 |
| N | -3.691431 | 2.672481 | 4.914958 |
| H | -3.528142 | 3.635440 | 4.668780 |
| C | -4.566476 | 2.378070 | 6.024431 |
| H | -4.176674 | 1.533260 | 6.592592 |
| H | -4.616125 | 3.249757 | 6.674062 |
| H | -5.576140 | 2.129229 | 5.685849 |

*Tyr•AuCl<sub>3</sub>*

MP2=-2313,974421

|    |        |        |        |
|----|--------|--------|--------|
| H  | 2.703  | 1.000  | 0.962  |
| C  | 2.555  | 2.050  | 1.235  |
| H  | 2.380  | 2.085  | 2.316  |
| H  | 1.667  | 2.433  | 0.723  |
| C  | 3.810  | 2.819  | 0.919  |
| O  | 4.919  | 2.451  | 1.302  |
| N  | 3.641  | 3.955  | 0.198  |
| H  | 2.734  | 4.250  | -0.149 |
| C  | 4.759  | 4.786  | -0.164 |
| H  | 5.423  | 4.885  | 0.709  |
| C  | 5.559  | 4.173  | -1.344 |
| H  | 5.579  | 3.086  | -1.186 |
| H  | 5.017  | 4.366  | -2.280 |
| C  | 6.957  | 4.695  | -1.401 |
| C  | 7.367  | 5.621  | -2.307 |
| H  | 6.683  | 5.989  | -3.073 |
| C  | 8.714  | 6.144  | -2.284 |
| H  | 9.171  | 6.330  | -3.261 |
| C  | 9.705  | 5.561  | -1.316 |
| O  | 10.886 | 5.894  | -1.348 |
| C  | 9.188  | 4.575  | -0.370 |
| H  | 9.887  | 4.182  | 0.365  |
| C  | 7.898  | 4.182  | -0.420 |
| H  | 7.518  | 3.444  | 0.290  |
| C  | 4.210  | 6.140  | -0.593 |
| O  | 3.087  | 6.225  | -1.086 |
| N  | 5.053  | 7.178  | -0.442 |
| H  | 5.973  | 7.026  | -0.033 |
| C  | 4.761  | 8.500  | -0.953 |
| H  | 3.679  | 8.598  | -1.074 |
| H  | 5.119  | 9.257  | -0.248 |
| H  | 5.244  | 8.670  | -1.927 |
| Au | 8.477  | 8.246  | -1.729 |
| Cl | 8.271  | 10.686 | -1.185 |

Cl 8.496 8.718 -4.085  
Cl 8.272 7.687 0.609

*Tyr*

MP2=-800.589660

|   |           |           |          |
|---|-----------|-----------|----------|
| H | 0.000000  | 0.000000  | 0.000000 |
| C | 0.000000  | 0.000000  | 1.091113 |
| H | 1.028741  | 0.000000  | 1.450604 |
| H | -0.494238 | -0.915336 | 1.421459 |
| C | -0.802965 | 1.177606  | 1.571821 |
| O | -1.970992 | 1.343720  | 1.233911 |
| N | -0.164306 | 2.032467  | 2.388895 |
| H | 0.796018  | 1.880465  | 2.657852 |
| C | -0.796506 | 3.197993  | 2.942858 |
| H | -1.454175 | 3.630251  | 2.184396 |
| C | -1.645537 | 2.838309  | 4.182412 |
| H | -2.320206 | 2.038254  | 3.868148 |
| H | -0.979654 | 2.428167  | 4.946137 |
| C | -2.424265 | 3.997414  | 4.727548 |
| C | -2.018214 | 4.667067  | 5.877004 |
| H | -1.139823 | 4.323010  | 6.413550 |
| C | -2.706451 | 5.773440  | 6.351516 |
| H | -2.372486 | 6.279138  | 7.251941 |
| C | -3.826187 | 6.235766  | 5.669030 |
| O | -4.541400 | 7.312816  | 6.078448 |
| H | -4.152609 | 7.676488  | 6.880875 |
| C | -4.249836 | 5.578769  | 4.518066 |
| H | -5.127266 | 5.940670  | 3.994845 |
| C | -3.552990 | 4.473173  | 4.060953 |
| H | -3.896062 | 3.967616  | 3.163453 |
| C | 0.302216  | 4.184452  | 3.316697 |
| O | 1.420247  | 3.790457  | 3.632508 |
| N | -0.050290 | 5.473529  | 3.302082 |
| H | -1.013640 | 5.699274  | 3.115128 |
| C | 0.815979  | 6.518183  | 3.792705 |
| H | 1.837402  | 6.328816  | 3.465115 |
| H | 0.483398  | 7.473806  | 3.391343 |
| H | 0.804828  | 6.568490  | 4.885577 |

*Phe•AuCl<sub>3</sub>*

MP2=-2239,26168

|   |       |       |       |
|---|-------|-------|-------|
| H | 2.409 | 1.264 | 1.285 |
| C | 2.329 | 2.342 | 1.468 |
| H | 2.111 | 2.474 | 2.534 |
| H | 1.495 | 2.741 | 0.882 |
| C | 3.651 | 2.989 | 1.158 |
| O | 4.688 | 2.682 | 1.738 |
| N | 3.625 | 3.949 | 0.195 |

|    |        |        |        |
|----|--------|--------|--------|
| H  | 2.787  | 4.141  | -0.344 |
| C  | 4.821  | 4.624  | -0.230 |
| H  | 5.445  | 4.830  | 0.652  |
| C  | 5.624  | 3.727  | -1.218 |
| H  | 5.817  | 2.779  | -0.700 |
| H  | 4.980  | 3.536  | -2.087 |
| C  | 6.898  | 4.377  | -1.624 |
| C  | 6.930  | 5.221  | -2.751 |
| H  | 6.038  | 5.320  | -3.369 |
| C  | 8.075  | 5.911  | -3.069 |
| H  | 8.121  | 6.544  | -3.952 |
| C  | 9.234  | 5.819  | -2.223 |
| H  | 10.210 | 6.052  | -2.658 |
| C  | 9.199  | 4.908  | -1.119 |
| H  | 10.092 | 4.788  | -0.509 |
| C  | 8.050  | 4.215  | -0.829 |
| H  | 8.013  | 3.543  | 0.027  |
| C  | 4.408  | 5.901  | -0.953 |
| O  | 3.444  | 5.884  | -1.715 |
| N  | 5.197  | 6.968  | -0.737 |
| H  | 5.984  | 6.884  | -0.098 |
| C  | 5.064  | 8.206  | -1.475 |
| H  | 4.074  | 8.232  | -1.936 |
| H  | 5.173  | 9.059  | -0.798 |
| H  | 5.826  | 8.282  | -2.265 |
| Au | 8.988  | 7.882  | -1.299 |
| Cl | 8.191  | 7.141  | 0.830  |
| Cl | 8.824  | 10.130 | -0.480 |
| Cl | 9.831  | 8.719  | -3.360 |

*Phe*

MP2=-725.460395

|   |           |           |          |
|---|-----------|-----------|----------|
| H | 0.000000  | 0.000000  | 0.000000 |
| C | 0.000000  | 0.000000  | 1.091430 |
| H | 1.039945  | 0.000000  | 1.421670 |
| H | -0.490731 | -0.904966 | 1.448725 |
| C | -0.655628 | 1.266270  | 1.569608 |
| O | -0.209735 | 2.372644  | 1.282066 |
| N | -1.753757 | 1.111688  | 2.329561 |
| H | -2.113136 | 0.195084  | 2.549235 |
| C | -2.500501 | 2.223824  | 2.849271 |
| H | -1.797445 | 3.006369  | 3.145235 |
| C | -3.458763 | 2.799481  | 1.783348 |
| H | -2.844638 | 3.020305  | 0.907096 |
| H | -4.170530 | 2.018584  | 1.504103 |
| C | -4.178118 | 4.033116  | 2.240323 |
| C | -5.517861 | 3.986314  | 2.616150 |
| H | -6.058426 | 3.047983  | 2.543418 |



|   |           |          |          |
|---|-----------|----------|----------|
| C | -6.164156 | 5.120072 | 3.088729 |
| H | -7.208180 | 5.064558 | 3.376110 |
| C | -5.475327 | 6.320455 | 3.196181 |
| H | -5.977760 | 7.206509 | 3.567068 |
| C | -4.139120 | 6.380400 | 2.821703 |
| H | -3.594952 | 7.315178 | 2.897106 |
| C | -3.498002 | 5.245648 | 2.345874 |
| H | -2.454482 | 5.299703 | 2.050781 |
| C | -3.285259 | 1.729504 | 4.057639 |
| O | -3.664747 | 0.565171 | 4.126679 |
| N | -3.545352 | 2.648707 | 4.992068 |
| H | -3.262864 | 3.598926 | 4.816015 |
| C | -4.418887 | 2.388692 | 6.111009 |
| H | -4.208363 | 1.400420 | 6.518148 |
| H | -4.241626 | 3.137413 | 6.880885 |
| H | -5.471362 | 2.425699 | 5.814674 |

**Table S5.** Cartesian coordinates for the complexes of Au(III) and charged amino acids (Figure 8 in main text).

*Asp•AuCl<sub>3</sub>*

MP2=-2196,592226

|    |       |       |        |
|----|-------|-------|--------|
| H  | 1.847 | 1.395 | -0.522 |
| C  | 2.036 | 2.196 | 0.201  |
| H  | 1.900 | 1.768 | 1.202  |
| H  | 1.299 | 2.992 | 0.054  |
| C  | 3.463 | 2.658 | 0.059  |
| O  | 4.412 | 1.881 | 0.129  |
| N  | 3.631 | 3.987 | -0.145 |
| H  | 2.849 | 4.634 | -0.178 |
| C  | 4.937 | 4.588 | -0.249 |
| H  | 5.596 | 4.158 | 0.518  |
| C  | 5.550 | 4.315 | -1.631 |
| H  | 5.507 | 3.230 | -1.796 |
| H  | 4.958 | 4.801 | -2.417 |
| C  | 6.998 | 4.730 | -1.802 |
| O  | 7.713 | 4.486 | -0.727 |
| O  | 7.433 | 5.205 | -2.837 |
| C  | 4.760 | 6.089 | -0.023 |
| O  | 3.653 | 6.613 | -0.135 |
| N  | 5.891 | 6.761 | 0.263  |
| H  | 6.768 | 6.251 | 0.333  |
| C  | 5.929 | 8.198 | 0.425  |
| H  | 4.901 | 8.568 | 0.447  |
| H  | 6.428 | 8.462 | 1.365  |
| H  | 6.466 | 8.677 | -0.403 |
| Au | 9.702 | 4.956 | -0.983 |
| Cl | 9.263 | 7.077 | -0.007 |

Cl 10.049 2.822 -1.960  
Cl 12.001 5.470 -1.182

*Asp*

MP2=-682.761821

|   |           |           |          |
|---|-----------|-----------|----------|
| H | 0.000000  | 0.000000  | 0.000000 |
| C | 0.000000  | 0.000000  | 1.091356 |
| H | 1.029110  | 0.000000  | 1.450088 |
| H | -0.493301 | -0.916069 | 1.421085 |
| C | -0.802571 | 1.179269  | 1.572739 |
| O | -1.978786 | 1.328947  | 1.249926 |
| N | -0.159323 | 2.041339  | 2.372620 |
| H | 0.829565  | 1.947058  | 2.555500 |
| C | -0.760929 | 3.249705  | 2.875769 |
| H | -1.343930 | 3.717567  | 2.077395 |
| C | -1.708156 | 2.970916  | 4.048769 |
| H | -2.256514 | 2.054476  | 3.820512 |
| H | -1.135195 | 2.768811  | 4.959504 |
| C | -2.759370 | 4.046681  | 4.369375 |
| O | -3.603592 | 3.733959  | 5.227931 |
| O | -2.700371 | 5.144241  | 3.750630 |
| C | 0.385877  | 4.188183  | 3.258259 |
| O | 1.555345  | 3.800270  | 3.270520 |
| N | 0.003649  | 5.419613  | 3.578123 |
| H | -1.015119 | 5.571057  | 3.611111 |
| C | 0.936518  | 6.414387  | 4.040656 |
| H | 1.726605  | 6.581234  | 3.304962 |
| H | 0.402133  | 7.349880  | 4.198012 |
| H | 1.409761  | 6.117536  | 4.981286 |

*Glu•AuCl<sub>3</sub>*

MP2=-2235,803638

|   |       |       |        |
|---|-------|-------|--------|
| H | 1.954 | 1.608 | 0.262  |
| C | 2.372 | 2.126 | -0.608 |
| H | 1.637 | 2.847 | -0.982 |
| H | 2.550 | 1.370 | -1.381 |
| C | 3.689 | 2.746 | -0.220 |
| O | 4.596 | 2.090 | 0.283  |
| N | 3.803 | 4.076 | -0.461 |
| H | 3.065 | 4.597 | -0.922 |
| C | 5.021 | 4.809 | -0.189 |
| H | 5.472 | 4.391 | 0.722  |
| C | 6.006 | 4.670 | -1.354 |
| H | 6.176 | 3.595 | -1.515 |
| H | 5.529 | 5.066 | -2.264 |
| C | 7.344 | 5.371 | -1.121 |
| H | 7.215 | 6.460 | -1.093 |
| H | 7.795 | 5.044 | -0.174 |

C 8.284 4.982 -2.242  
O 8.049 5.671 -3.331  
O 9.104 4.082 -2.142  
C 4.632 6.269 -0.002  
O 3.790 6.780 -0.738  
N 5.292 6.930 0.970  
H 5.938 6.414 1.555  
C 5.087 8.336 1.248  
H 4.401 8.730 0.494  
H 4.647 8.481 2.241  
H 6.033 8.885 1.195  
Au 9.063 4.909 -4.944  
Cl 10.806 6.477 -4.565  
Cl 10.162 4.074 -6.870  
Cl 7.276 3.366 -5.218

*Glu*

MP2=-721.969974

|   |           |           |          |
|---|-----------|-----------|----------|
| H | 0.000000  | 0.000000  | 0.000000 |
| C | 0.000000  | 0.000000  | 1.091292 |
| H | 1.029228  | 0.000000  | 1.449658 |
| H | -0.493864 | -0.915544 | 1.421389 |
| C | -0.804153 | 1.178175  | 1.571467 |
| O | -1.977637 | 1.329926  | 1.244426 |
| N | -0.157436 | 2.045111  | 2.367558 |
| H | 0.804194  | 1.887180  | 2.625964 |
| C | -0.781938 | 3.217882  | 2.929539 |
| H | -1.520501 | 3.581900  | 2.210277 |
| C | -1.488319 | 2.898302  | 4.252520 |
| H | -2.175402 | 2.071892  | 4.062837 |
| H | -0.740375 | 2.530955  | 4.962469 |
| C | -2.254680 | 4.063624  | 4.844088 |
| H | -1.583721 | 4.874843  | 5.137896 |
| H | -2.926149 | 4.490446  | 4.087247 |
| C | -3.134504 | 3.720989  | 6.060808 |
| O | -3.535038 | 4.702998  | 6.728727 |
| O | -3.397693 | 2.516945  | 6.274267 |
| C | 0.314484  | 4.252775  | 3.137368 |
| O | 1.433888  | 3.916018  | 3.511650 |
| N | -0.026663 | 5.525951  | 2.917555 |
| H | -0.969504 | 5.732061  | 2.635000 |
| C | 0.876488  | 6.619628  | 3.185572 |
| H | 1.825145  | 6.463532  | 2.669933 |
| H | 0.425637  | 7.542874  | 2.827796 |
| H | 1.078711  | 6.714044  | 4.255655 |

*Lys•Au/Cl<sub>3</sub>*

MP2=-2181,652789

H 2.157 1.253 -0.436  
 C 2.096 2.174 0.156  
 H 1.734 1.895 1.151  
 H 1.371 2.848 -0.311  
 C 3.477 2.763 0.285  
 O 4.407 2.141 0.792  
 N 3.620 4.026 -0.186  
 H 2.854 4.511 -0.641  
 C 4.888 4.723 -0.166  
 H 5.419 4.437 0.754  
 C 5.740 4.344 -1.382  
 H 5.839 3.248 -1.379  
 H 5.178 4.614 -2.291  
 C 7.118 4.986 -1.405  
 H 7.029 6.081 -1.485  
 H 7.638 4.787 -0.453  
 C 7.960 4.464 -2.561  
 H 8.081 3.373 -2.472  
 H 7.440 4.651 -3.514  
 C 9.323 5.129 -2.585  
 H 9.239 6.216 -2.708  
 H 9.882 4.933 -1.661  
 N 10.150 4.625 -3.712  
 H 9.694 4.811 -4.612  
 H 10.287 3.612 -3.641  
 C 4.575 6.213 -0.187  
 O 3.676 6.643 -0.907  
 N 5.361 6.988 0.588  
 H 6.056 6.540 1.173  
 C 5.245 8.430 0.638  
 H 4.478 8.729 -0.080  
 H 4.950 8.766 1.638  
 H 6.194 8.906 0.369  
 Au 12.053 5.501 -3.796  
 Cl 12.852 3.725 -2.442  
 Cl 14.185 6.503 -3.864  
 Cl 11.110 7.222 -5.129

Lys

MP2=-668.270834

|   |           |           |          |
|---|-----------|-----------|----------|
| H | 0.000000  | 0.000000  | 0.000000 |
| C | 0.000000  | 0.000000  | 1.091390 |
| H | 1.039901  | 0.000000  | 1.421812 |
| H | -0.490367 | -0.905066 | 1.448897 |
| C | -0.655748 | 1.266108  | 1.570503 |
| O | -0.210249 | 2.372096  | 1.282004 |
| N | -1.751531 | 1.107589  | 2.333650 |
| H | -2.109932 | 0.186959  | 2.534507 |

|   |           |          |           |
|---|-----------|----------|-----------|
| C | -2.507375 | 2.217839 | 2.857243  |
| H | -1.807707 | 3.031998 | 3.062483  |
| C | -3.555521 | 2.699243 | 1.848143  |
| H | -3.023805 | 2.915441 | 0.917025  |
| H | -4.242617 | 1.871631 | 1.644156  |
| C | -4.328956 | 3.927298 | 2.296027  |
| H | -4.897607 | 3.704265 | 3.204579  |
| H | -3.627942 | 4.729242 | 2.554927  |
| C | -5.280587 | 4.420757 | 1.216767  |
| H | -4.714610 | 4.669919 | 0.313082  |
| H | -5.981445 | 3.622656 | 0.949848  |
| C | -6.046720 | 5.634104 | 1.690459  |
| H | -6.662036 | 5.407270 | 2.560715  |
| H | -5.380701 | 6.459654 | 1.940702  |
| N | -6.970820 | 6.138464 | 0.631158  |
| H | -7.647431 | 5.426103 | 0.355244  |
| H | -7.495638 | 6.952908 | 0.950527  |
| H | -6.459587 | 6.413959 | -0.208180 |
| C | -3.176393 | 1.743926 | 4.140408  |
| O | -3.676727 | 0.626079 | 4.207245  |
| N | -3.212553 | 2.621820 | 5.146277  |
| H | -2.748560 | 3.507149 | 5.037000  |
| C | -3.882937 | 2.332011 | 6.392001  |
| H | -4.919338 | 2.042160 | 6.209790  |
| H | -3.387252 | 1.517530 | 6.925021  |
| H | -3.867267 | 3.224095 | 7.014375  |

*Arg•AuCl<sub>3</sub>*

MP2=-2290,995221

|   |       |       |        |
|---|-------|-------|--------|
| H | 2.040 | 1.417 | -0.299 |
| C | 2.020 | 2.358 | 0.263  |
| H | 1.654 | 2.126 | 1.270  |
| H | 1.318 | 3.045 | -0.221 |
| C | 3.423 | 2.896 | 0.366  |
| O | 4.324 | 2.268 | 0.916  |
| N | 3.622 | 4.119 | -0.185 |
| H | 2.880 | 4.605 | -0.678 |
| C | 4.920 | 4.758 | -0.201 |
| H | 5.433 | 4.510 | 0.739  |
| C | 5.757 | 4.259 | -1.384 |
| H | 5.813 | 3.164 | -1.302 |
| H | 5.208 | 4.488 | -2.311 |
| C | 7.158 | 4.848 | -1.444 |
| H | 7.109 | 5.935 | -1.611 |
| H | 7.677 | 4.693 | -0.484 |
| C | 7.966 | 4.209 | -2.556 |
| H | 8.069 | 3.129 | -2.370 |
| H | 7.444 | 4.339 | -3.518 |

N 9.289 4.818 -2.628  
H 9.470 5.615 -2.029  
C 10.274 4.409 -3.436  
N 10.024 3.464 -4.350  
H 9.127 3.000 -4.383  
H 10.810 2.982 -4.778  
N 11.508 4.914 -3.306  
H 11.568 5.711 -2.676  
C 4.676 6.256 -0.325  
O 3.813 6.676 -1.092  
N 5.482 7.044 0.416  
H 6.135 6.606 1.054  
C 5.421 8.490 0.381  
H 4.699 8.777 -0.387  
H 5.096 8.894 1.347  
H 6.400 8.913 0.132  
Au 12.801 5.165 -4.877  
Cl 12.345 7.487 -4.762  
Cl 13.215 2.812 -4.952  
Cl 14.325 5.505 -6.664

#### Arg

MP2=-777.621172

|   |           |           |           |
|---|-----------|-----------|-----------|
| H | 0.000000  | 0.000000  | 0.000000  |
| C | 0.000000  | 0.000000  | 1.091282  |
| H | 1.040034  | 0.000000  | 1.421645  |
| H | -0.490115 | -0.904938 | 1.449459  |
| C | -0.654852 | 1.266557  | 1.569781  |
| O | -0.222835 | 2.372535  | 1.261717  |
| N | -1.734591 | 1.111047  | 2.356654  |
| H | -2.088971 | 0.192301  | 2.572944  |
| C | -2.484712 | 2.225893  | 2.876993  |
| H | -1.781841 | 3.035755  | 3.088910  |
| C | -3.520904 | 2.714203  | 1.858004  |
| H | -2.983487 | 2.894255  | 0.922910  |
| H | -4.232152 | 1.902833  | 1.673948  |
| C | -4.252009 | 3.975820  | 2.281058  |
| H | -4.818622 | 3.798199  | 3.200482  |
| H | -3.528587 | 4.770305  | 2.493953  |
| C | -5.200166 | 4.446378  | 1.196522  |
| H | -4.638387 | 4.639044  | 0.276837  |
| H | -5.940728 | 3.666235  | 0.988284  |
| N | -5.869686 | 5.665750  | 1.614328  |
| H | -5.726684 | 5.978074  | 2.561078  |
| C | -6.681855 | 6.378320  | 0.847042  |
| N | -6.947177 | 5.982604  | -0.391593 |
| H | -6.601950 | 5.108459  | -0.744779 |
| H | -7.566706 | 6.509523  | -0.981667 |

|   |           |          |          |
|---|-----------|----------|----------|
| N | -7.233113 | 7.493117 | 1.317932 |
| H | -6.975820 | 7.856314 | 2.218484 |
| H | -7.824666 | 8.062903 | 0.739757 |
| C | -3.169163 | 1.754655 | 4.153416 |
| O | -3.663754 | 0.634447 | 4.217462 |
| N | -3.228870 | 2.640258 | 5.151691 |
| H | -2.747831 | 3.518029 | 5.053484 |
| C | -3.910288 | 2.353039 | 6.392219 |
| H | -4.904725 | 1.953315 | 6.189912 |
| H | -3.359714 | 1.621059 | 6.988247 |
| H | -4.005589 | 3.274577 | 6.962602 |

**Table S6.** Cartesian coordinates for the complexes of Au(III) and polar amino acids (Figure 9 in main text).

*Asn•AuCl<sub>3</sub>*

MP2= -2176,728037

|    |       |       |        |
|----|-------|-------|--------|
| H  | 1.624 | 2.504 | -1.440 |
| C  | 1.976 | 2.591 | -0.405 |
| H  | 1.828 | 1.618 | 0.074  |
| H  | 1.372 | 3.345 | 0.110  |
| C  | 3.446 | 2.906 | -0.421 |
| O  | 4.287 | 2.067 | -0.753 |
| N  | 3.772 | 4.181 | -0.105 |
| H  | 3.051 | 4.871 | 0.094  |
| C  | 5.115 | 4.708 | -0.031 |
| H  | 5.649 | 4.272 | 0.829  |
| C  | 5.971 | 4.391 | -1.272 |
| H  | 6.900 | 4.970 | -1.249 |
| H  | 6.221 | 3.328 | -1.264 |
| C  | 5.251 | 4.729 | -2.544 |
| O  | 5.271 | 5.948 | -2.889 |
| N  | 4.647 | 3.755 | -3.190 |
| H  | 4.152 | 3.903 | -4.065 |
| H  | 4.617 | 2.828 | -2.765 |
| C  | 4.966 | 6.219 | 0.206  |
| O  | 3.861 | 6.751 | 0.214  |
| N  | 6.110 | 6.897 | 0.401  |
| H  | 6.987 | 6.399 | 0.487  |
| C  | 6.096 | 8.331 | 0.613  |
| H  | 5.603 | 8.589 | 1.559  |
| H  | 7.125 | 8.695 | 0.634  |
| H  | 5.558 | 8.825 | -0.204 |
| Au | 4.311 | 6.764 | -4.562 |
| Cl | 5.670 | 5.449 | -5.998 |
| Cl | 3.300 | 7.783 | -6.400 |
| Cl | 2.959 | 8.036 | -3.089 |

*Asn*

MP2=-663.3543395

|   |           |           |          |
|---|-----------|-----------|----------|
| H | 0.000000  | 0.000000  | 0.000000 |
| C | 0.000000  | 0.000000  | 1.091553 |
| H | 1.039685  | 0.000000  | 1.422103 |
| H | -0.492991 | -0.903569 | 1.448840 |
| C | -0.655276 | 1.263180  | 1.570652 |
| O | -0.196930 | 2.373326  | 1.303415 |
| N | -1.778573 | 1.118588  | 2.292533 |
| H | -2.101069 | 0.212731  | 2.600877 |
| C | -2.446916 | 2.253347  | 2.861379 |
| H | -1.705446 | 2.844922  | 3.413415 |
| C | -3.083332 | 3.160357  | 1.782919 |
| H | -2.600512 | 2.951561  | 0.830514 |
| H | -4.150500 | 2.963060  | 1.683671 |
| C | -2.881172 | 4.605501  | 2.165313 |
| O | -3.681039 | 5.201752  | 2.883675 |
| N | -1.744137 | 5.148799  | 1.714935 |
| H | -1.469957 | 6.060852  | 2.042125 |
| H | -1.049329 | 4.553507  | 1.287690 |
| C | -3.463536 | 1.748484  | 3.886612 |
| O | -3.507680 | 0.564697  | 4.204087 |
| N | -4.260696 | 2.685213  | 4.401463 |
| H | -4.206056 | 3.632827  | 4.039689 |
| C | -5.269468 | 2.363426  | 5.382386 |
| H | -4.824916 | 1.852757  | 6.238490 |
| H | -5.732029 | 3.287618  | 5.722907 |
| H | -6.041873 | 1.714957  | 4.961090 |

*Gln•AuCl<sub>3</sub>*

MP2= -2215,942717

|   |       |       |        |
|---|-------|-------|--------|
| H | 1.611 | 1.955 | 0.495  |
| C | 2.018 | 2.423 | -0.408 |
| H | 1.344 | 3.223 | -0.731 |
| H | 2.049 | 1.651 | -1.186 |
| C | 3.421 | 2.889 | -0.126 |
| O | 4.282 | 2.140 | 0.328  |
| N | 3.673 | 4.193 | -0.406 |
| H | 2.974 | 4.789 | -0.836 |
| C | 4.985 | 4.774 | -0.229 |
| H | 5.432 | 4.343 | 0.678  |
| C | 5.876 | 4.450 | -1.434 |
| H | 5.905 | 3.357 | -1.540 |
| H | 5.403 | 4.863 | -2.337 |
| C | 7.302 | 4.988 | -1.290 |
| H | 7.326 | 6.085 | -1.301 |
| H | 7.741 | 4.648 | -0.342 |
| C | 8.150 | 4.440 | -2.396 |



O 8.487 3.224 -2.282  
N 8.451 5.209 -3.423  
H 9.049 4.885 -4.178  
H 8.155 6.177 -3.447  
C 4.797 6.281 -0.104  
O 3.999 6.861 -0.835  
N 5.583 6.894 0.804  
H 6.159 6.324 1.412  
C 5.562 8.325 1.024  
H 4.960 8.779 0.234  
H 5.117 8.569 1.996  
H 6.577 8.734 0.985  
Au 9.330 2.042 -3.785  
Cl 11.292 3.381 -3.803  
Cl 10.248 0.614 -5.384  
Cl 7.318 0.786 -3.773

*Gln*

MP2=-702.569336

|   |           |           |          |
|---|-----------|-----------|----------|
| H | 0.000000  | 0.000000  | 0.000000 |
| C | 0.000000  | 0.000000  | 1.091145 |
| H | 1.028898  | 0.000000  | 1.450191 |
| H | -0.494308 | -0.915261 | 1.421491 |
| C | -0.803992 | 1.177534  | 1.570865 |
| O | -1.971955 | 1.340841  | 1.233162 |
| N | -0.162654 | 2.035466  | 2.383842 |
| H | 0.790094  | 1.864306  | 2.665433 |
| C | -0.796385 | 3.200457  | 2.948591 |
| H | -1.518971 | 3.576679  | 2.219814 |
| C | -1.526517 | 2.851542  | 4.249473 |
| H | -2.207220 | 2.026577  | 4.033633 |
| H | -0.790536 | 2.485094  | 4.971431 |
| C | -2.311338 | 4.008316  | 4.838726 |
| H | -1.654850 | 4.835664  | 5.117858 |
| H | -3.012723 | 4.404021  | 4.093730 |
| C | -3.148536 | 3.583526  | 6.027213 |
| O | -3.637643 | 2.465788  | 6.116432 |
| N | -3.340144 | 4.528912  | 6.963403 |
| H | -3.934308 | 4.330503  | 7.750963 |
| H | -2.938776 | 5.446081  | 6.882971 |
| C | 0.298337  | 4.227732  | 3.205934 |
| O | 1.384853  | 3.880743  | 3.656780 |
| N | -0.013458 | 5.501717  | 2.953161 |
| H | -0.905183 | 5.713953  | 2.539792 |
| C | 0.905511  | 6.581913  | 3.225522 |
| H | 1.234544  | 6.549246  | 4.265594 |
| H | 1.787650  | 6.519469  | 2.584227 |
| H | 0.399338  | 7.527092  | 3.041839 |

*Ser•Au/Cl<sub>3</sub>*

MP2=-2083,401118

H 6.677 -1.081 -0.205  
C 6.090 -0.315 0.310  
H 6.659 0.622 0.267  
H 5.966 -0.595 1.361  
C 4.784 -0.125 -0.413  
O 4.697 -0.109 -1.636  
N 3.696 0.053 0.385  
H 3.763 0.062 1.398  
C 2.399 0.355 -0.162  
H 2.514 1.001 -1.045  
C 1.751 -0.954 -0.605  
H 2.414 -1.441 -1.328  
H 1.568 -1.621 0.247  
O 0.507 -0.674 -1.294  
H 0.322 -1.378 -1.942  
C 1.589 1.048 0.931  
O 1.830 0.851 2.114  
N 0.565 1.822 0.495  
H 0.553 2.107 -0.479  
C -0.256 2.566 1.437  
H -0.600 1.892 2.229  
H 0.302 3.392 1.894  
H -1.125 2.963 0.905  
Au -1.357 -0.270 -0.232  
Cl -3.376 0.210 0.805  
Cl -0.760 -1.672 1.575  
Cl -1.919 1.158 -2.038

*Ser*

MP2=-570.0331055

H 0.000000 0.000000 0.000000  
C 0.000000 0.000000 1.091227  
H 1.040153 0.000000 1.421400  
H -0.490930 -0.904722 1.448638  
C -0.654499 1.265944 1.571459  
O -0.229171 2.372423 1.258614  
N -1.739065 1.109184 2.353846  
H -1.982735 0.200462 2.720941  
C -2.406816 2.217433 2.974086  
H -1.662937 2.947965 3.314366  
C -3.320555 2.937230 1.982896  
H -2.767689 3.061939 1.047345  
H -4.211975 2.329776 1.787976  
O -3.662548 4.195256 2.539116  
H -4.374823 4.579763 2.021006  
C -3.157968 1.683148 4.195590

|   |           |          |          |
|---|-----------|----------|----------|
| O | -3.065806 | 0.507518 | 4.535831 |
| N | -3.898062 | 2.582475 | 4.845684 |
| H | -3.996702 | 3.494684 | 4.421134 |
| C | -4.696962 | 2.226944 | 5.993250 |
| H | -4.082700 | 1.727027 | 6.743631 |
| H | -5.112708 | 3.135093 | 6.425211 |
| H | -5.516268 | 1.556270 | 5.720416 |

*Thr•AuCl<sub>3</sub>*

MP2=-2122,620542

|    |       |       |        |
|----|-------|-------|--------|
| H  | 1.676 | 1.312 | 0.723  |
| C  | 1.794 | 2.396 | 0.645  |
| H  | 1.404 | 2.844 | 1.568  |
| H  | 1.199 | 2.773 | -0.194 |
| C  | 3.255 | 2.729 | 0.519  |
| O  | 4.137 | 2.073 | 1.056  |
| N  | 3.532 | 3.835 | -0.242 |
| H  | 2.781 | 4.491 | -0.455 |
| C  | 4.840 | 4.441 | -0.217 |
| H  | 5.377 | 4.098 | 0.682  |
| C  | 5.688 | 4.030 | -1.425 |
| H  | 6.648 | 4.559 | -1.397 |
| C  | 5.885 | 2.546 | -1.588 |
| H  | 4.928 | 2.038 | -1.767 |
| H  | 6.561 | 2.332 | -2.425 |
| H  | 6.320 | 2.128 | -0.675 |
| O  | 5.018 | 4.600 | -2.600 |
| C  | 4.658 | 5.964 | -0.201 |
| O  | 3.568 | 6.464 | -0.457 |
| N  | 5.775 | 6.666 | 0.067  |
| H  | 6.613 | 6.169 | 0.343  |
| C  | 5.811 | 8.114 | 0.077  |
| H  | 4.838 | 8.478 | -0.261 |
| H  | 6.004 | 8.495 | 1.087  |
| H  | 6.589 | 8.484 | -0.599 |
| H  | 4.191 | 4.098 | -2.767 |
| Au | 6.074 | 4.708 | -4.455 |
| Cl | 7.651 | 6.154 | -3.440 |
| Cl | 7.177 | 4.868 | -6.486 |
| Cl | 4.458 | 3.229 | -5.357 |

*Thr*

MP2=-609.255219

|   |           |           |          |
|---|-----------|-----------|----------|
| H | 0.000000  | 0.000000  | 0.000000 |
| C | 0.000000  | 0.000000  | 1.091474 |
| H | 1.039860  | 0.000000  | 1.421591 |
| H | -0.491465 | -0.904956 | 1.447671 |
| C | -0.655021 | 1.267109  | 1.569426 |

|   |           |          |          |
|---|-----------|----------|----------|
| O | -0.198237 | 2.369621 | 1.289592 |
| N | -1.772994 | 1.104960 | 2.303380 |
| H | -2.044911 | 0.181087 | 2.598817 |
| C | -2.475356 | 2.194090 | 2.918534 |
| H | -1.827808 | 3.072999 | 2.871985 |
| C | -3.784132 | 2.539041 | 2.195436 |
| H | -4.225884 | 3.400292 | 2.715718 |
| C | -3.560709 | 2.901048 | 0.743512 |
| H | -3.102529 | 2.067629 | 0.207856 |
| H | -4.514974 | 3.138557 | 0.266815 |
| H | -2.910759 | 3.773822 | 0.657653 |
| O | -4.630410 | 1.410390 | 2.333973 |
| H | -5.439210 | 1.576632 | 1.841205 |
| C | -2.754489 | 1.831413 | 4.378363 |
| O | -2.675650 | 0.678336 | 4.781367 |
| N | -3.112042 | 2.853905 | 5.163563 |
| H | -3.105446 | 3.787061 | 4.788879 |
| C | -3.462051 | 2.664984 | 6.551392 |
| H | -4.270392 | 1.937777 | 6.647603 |
| H | -2.607164 | 2.305378 | 7.129002 |
| H | -3.791284 | 3.617063 | 6.962357 |
